# Supplementary material
Source: Elsevier journal article supplement (https://www.sciencedirect.com/science/article/pii/S0300893220306436)
Supplement: mmc1 [file mmc1.pdf]

MATERIAL ADICIONAL

**Tabla 1 del material adicional**

Causas de mortalidad con asociación causal establecida con el consumo de tabaco. Correspondencia con los códigos de la Clasificación Internacional de Enfermedades 10.<sup>a</sup> revisión (CIE-10)

| Causas de muerte                      | Código CIE-10   |
|---------------------------------------|-----------------|
| <i>Tumores</i>                        |                 |
| Cáncer de tráquea-bronquios-pulmón    | C33-34          |
| Otros cánceres                        |                 |
| Labio, faringe, cavidad oral          | C00-14          |
| Esófago                               | C15             |
| Estómago                              | C16             |
| Páncreas                              | C25             |
| Laringe                               | C32             |
| Cuello de útero                       | C53             |
| Riñón y pelvis renal                  | C64-65          |
| Vejiga                                | C67             |
| Células hepáticas                     | C22             |
| Colon y recto                         | C18-20          |
| Leucemia mieloide aguda               | C92             |
| <i>Enfermedades cardiometabólicas</i> |                 |
| Enfermedad isquémica del corazón      | I20-25          |
| Otras enfermedades del corazón        |                 |
| Enfermedad reumática del corazón      | I00-02 / I05-09 |

|                                                                     |                 |
|---------------------------------------------------------------------|-----------------|
| Enfermedades cardiopulmonares y otras formas de enfermedad cardíaca | I26-28 / I30-51 |
| Enfermedad cerebrovascular                                          | I60-69          |
| Otras enfermedades vasculares                                       |                 |
| Ateroesclerosis                                                     | I70             |
| Aneurismas y otras                                                  | I71-78          |
| Diabetes mellitus                                                   | E10-14          |
| <i>Enfermedades respiratorias</i>                                   |                 |
| Enfermedad pulmonar obstructiva crónica                             | J40-44          |
| Influenza, neumonía                                                 | J09-18          |
| Tuberculosis                                                        | A15-19          |

Las causas incluidas son aquellas con asociación causal establecida con el consumo de tabaco según los *Centers for Disease Control and Prevention*<sup>1</sup>.

**Tabla 2 del material adicional**

Prevalencia de fumadores y exfumadores en población de edad  $\geq 35$  años en 2011-2012, 2014-2015 y 2016-2017

| <b>2.1. Prevalencia de fumadores y exfumadores entre los varones de 35 o más años en cada comunidad autónoma</b> |                       |                  |                  |                 |                       |                  |                  |                  |
|------------------------------------------------------------------------------------------------------------------|-----------------------|------------------|------------------|-----------------|-----------------------|------------------|------------------|------------------|
| Comunidad autónoma                                                                                               | Fumadores             |                  |                  |                 | Exfumadores           |                  |                  |                  |
|                                                                                                                  | Grupos de edad (años) |                  |                  |                 | Grupos de edad (años) |                  |                  |                  |
|                                                                                                                  | 35-54                 | 55-64            | 65-74            | $\geq 75$       | 35-54                 | 55-64            | 65-74            | $\geq 75$        |
|                                                                                                                  | % (IC95%)             | % (IC95%)        | % (IC95%)        | % (IC95%)       | % (IC95%)             | % (IC95%)        | % (IC95%)        | % (IC95%)        |
| Andalucía                                                                                                        | 37,5 (34,9-40,3)      | 30,2 (26,3-34,4) | 17,5 (13,9-21,9) | 11,6 (8,2-16,1) | 28,0 (25,5-30,6)      | 44,4 (40,0-49,0) | 54,4 (49,4-59,4) | 57,5 (51,6-63,2) |
| Aragón                                                                                                           | 35,8 (31,5-40,4)      | 27,4 (21,3-34,5) | 19,7 (14,5-26,2) | 5,8 (3,3-10,0)  | 30,1 (26,0-34,6)      | 49,9 (42,8-57,1) | 54,3 (46,7-61,7) | 57,6 (50,2-64,8) |
| Asturias                                                                                                         | 36,7 (31,8-41,8)      | 20,0 (15,1-26,1) | 19,2 (13,6-26,4) | 8,6 (4,8-14,9)  | 27,6 (23,2-32,5)      | 48,4 (41,2-55,6) | 52,6 (44,2-60,8) | 48,5 (40,1-57,1) |
| Islas Baleares                                                                                                   | 34,4 (29,6-39,5)      | 25,5 (19,2-33,0) | 15,7 (9,6-24,7)  | 13,4 (8,0-21,5) | 25,7 (21,5-30,4)      | 44,9 (36,9-53,2) | 57,8 (48,0-67,0) | 52,5 (42,5-62,3) |

|                      |                  |                  |                  |                 |                  |                  |                  |                  |
|----------------------|------------------|------------------|------------------|-----------------|------------------|------------------|------------------|------------------|
| Canarias             | 34,1 (30,1-38,4) | 30,1 (24,2-36,8) | 13,9 (9,4-20,0)  | 13,7 (8,3-22,0) | 23,7 (20,1-27,7) | 39,3 (32,7-46,2) | 57,2 (49,0-65,0) | 56,2 (46,3-65,7) |
| Cantabria            | 37,5 (32,1-43,4) | 27,3 (21,1-34,5) | 9,9 (6,2-15,5)   | 8,1 (4,7-13,6)  | 20,8 (16,4-26,0) | 38,4 (31,4-45,8) | 57,7 (49,1-65,8) | 58,4 (49,6-66,7) |
| Castilla y León      | 34,2 (30,5-38,2) | 27,6 (22,7-33,3) | 17,5 (13,1-22,9) | 6,0 (3,7-9,6)   | 29,2 (25,6-33,1) | 54,3 (48,4-60,1) | 54,5 (48,3-60,6) | 58,2 (51,9-64,3) |
| Castilla-La Mancha   | 37,1 (32,9-41,5) | 26,9 (21,0-33,7) | 17,5 (12,4-24,2) | 8,6 (5,3-13,5)  | 25,7 (22,1-29,8) | 48,6 (41,3-55,9) | 53,3 (45,7-60,8) | 53,3 (46,3-60,2) |
| Cataluña             | 37,0 (34,2-39,9) | 30,2 (25,8-34,9) | 16,6 (13,2-20,7) | 8,4 (5,9-11,9)  | 28,9 (26,2-31,6) | 44,9 (40,1-49,7) | 57,4 (52,4-62,3) | 56,6 (51,0-62,0) |
| Comunidad Valenciana | 36,6 (33,3-40,0) | 32,1 (27,1-37,6) | 21,2 (16,7-26,6) | 10,4 (7,0-15,1) | 27,6 (24,6-30,8) | 35,4 (30,1-41,2) | 49,4 (43,5-55,2) | 54,8 (48,1-61,3) |
| Extremadura          | 38,6 (34,1-43,2) | 32,1 (26,1-38,8) | 23,8 (17,5-31,6) | 9,2 (5,6-14,9)  | 32,0 (27,8-36,6) | 45,9 (39,2-52,7) | 53,3 (45,2-61,1) | 69,4 (61,8-76,1) |
| Galicia              | 32,5 (28,5-36,7) | 24,2 (19,4-29,9) | 17,1 (12,7-22,6) | 6,7 (4,0-10,8)  | 31,4 (27,5-35,5) | 45,1 (39,1-51,3) | 50,3 (43,8-56,7) | 49,5 (43,0-56,1) |
| Madrid               | 31,6 (28,9-34,4) | 28,4 (23,9-33,3) | 16,1 (12,4-20,6) | 8,3 (5,6-12,1)  | 28,0 (25,4-30,7) | 45,6 (40,4-51,0) | 58,3 (52,5-63,8) | 63,3 (57,2-69,0) |

|            |                  |                  |                  |                 |                  |                  |                  |                  |
|------------|------------------|------------------|------------------|-----------------|------------------|------------------|------------------|------------------|
| Murcia     | 36,6 (32,3-41,1) | 32,7 (25,6-40,6) | 22,7 (16,4-30,6) | 7,0 (3,6-13,1)  | 20,8 (17,4-24,6) | 35,4 (28,1-43,5) | 50,8 (42,2-59,2) | 50,8 (41,2-60,3) |
| Navarra    | 34,4 (29,5-39,8) | 28,0 (21,4-35,5) | 19,1 (13,4-26,4) | 8,3 (4,3-15,4)  | 25,0 (20,7-29,9) | 39,1 (31,7-47,1) | 43,4 (35,7-51,5) | 41,6 (32,3-51,6) |
| País Vasco | 38,1 (34,5-41,9) | 25,3 (20,2-31,0) | 12,1 (8,5-17,0)  | 10,1 (6,5-15,4) | 27,0 (23,7-30,6) | 50,9 (44,8-57,0) | 56,5 (49,7-63,1) | 53,6 (46,3-60,8) |
| La Rioja   | 35,2 (30,2-40,7) | 29,6 (22,3-38,2) | 14,9 (9,8-21,8)  | 6,1 (2,9-12,5)  | 26,4 (21,7-31,6) | 45,3 (36,8-54,1) | 46,1 (37,6-55,0) | 50,1 (40,9-59,2) |

IC95%: intervalo de confianza al 95%. Las prevalencias proceden de la estimación de los datos combinados de la Encuesta Nacional de Salud de España 2011-2012<sup>2</sup> y 2016-2017<sup>3</sup> y de la Encuesta Europea de Salud para España 2014-2015<sup>4</sup>.

| <b>2.2. Prevalencia de fumadoras y exfumadoras de 35 o más años en cada comunidad autónoma en 2011-2012, 2014-2015 y 2016-2017</b> |                       |       |       |      |                       |       |       |      |
|------------------------------------------------------------------------------------------------------------------------------------|-----------------------|-------|-------|------|-----------------------|-------|-------|------|
| Comunidad autónoma                                                                                                                 | Fumadoras             |       |       |      | Exfumadoras           |       |       |      |
|                                                                                                                                    | Grupos de edad (años) |       |       |      | Grupos de edad (años) |       |       |      |
|                                                                                                                                    | 35-54                 | 55-64 | 65-74 | ≥ 75 | 35-54                 | 55-64 | 65-74 | ≥ 75 |

|                    | % (IC95%)        | % (IC95%)        | % (IC95%)       | % (IC95%)     | % (IC95%)        | % (IC95%)        | % (IC95%)        | % (IC95%)       |
|--------------------|------------------|------------------|-----------------|---------------|------------------|------------------|------------------|-----------------|
| Andalucía          | 32,7 (30,1-35,4) | 22,4 (18,8-26,6) | 5,3 (3,6-7,6)   | 1,1 (0,5-2,4) | 22,3 (20,1-24,6) | 20,2 (16,9-23,9) | 11,4 (8,4-15,3)  | 4,0 (2,6-6,2)   |
| Aragón             | 30,3 (26,1-35,0) | 21,0 (16,0-27,1) | 11,0 (7,1-16,7) | 0,5 (0,2-1,6) | 28,5 (24,3-33,0) | 27,2 (21,7-33,6) | 12,9 (8,7-18,6)  | 5,3 (3,2-8,8)   |
| Asturias           | 32,5 (27,8-37,5) | 21,7 (16,9-27,4) | 4,3 (2,2-8,1)   | 1,5 (0,7-3,3) | 23,1 (19,0-27,7) | 24,9 (19,7-30,8) | 16,8 (11,9-23,1) | 4,1 (2,4-6,9)   |
| Islas Baleares     | 29,3 (25,1-34,0) | 17,3 (12,4-23,5) | 6,7 (3,7-11,7)  | 0,8 (0,1-5,2) | 24,9 (20,6-29,8) | 30,8 (24,1-38,4) | 16,5 (11,7-22,8) | 11,4 (6,9-18,5) |
| Canarias           | 28,0 (24,3-32,0) | 19,3 (14,6-25,0) | 10,3 (6,4-16,2) | 3,1 (1,0-9,0) | 18,2 (15,1-21,8) | 19,2 (14,5-24,8) | 13,3 (8,7-19,8)  | 7,0 (4,2-11,4)  |
| Cantabria          | 28,4 (23,9-33,4) | 23,0 (17,4-29,7) | 12,0 (7,6-18,5) | 0,6 (0,2-2,1) | 21,2 (17,4-25,6) | 17,5 (12,9-23,4) | 12,5 (8,4-18,2)  | 2,3 (1,1-4,9)   |
| Castilla y León    | 31,3 (27,5-35,3) | 25,3 (20,4-31,0) | 8,4 (5,7-12,3)  | 0,7 (0,3-1,8) | 23,4 (20,1-27,2) | 24,1 (19,5-29,5) | 13,9 (10,4-18,4) | 2,8 (1,6-5,0)   |
| Castilla-La Mancha | 30,3 (26,5-34,4) | 19,0 (14,1-25,2) | 4,5 (2,5-8,2)   | 1,1 (0,3-4,5) | 23,5 (20,1-27,3) | 14,3 (10,0-19,9) | 5,4 (2,9-9,7)    | 0,7 (0,2-2,3)   |

|                      |                  |                  |                 |               |                  |                  |                  |                |
|----------------------|------------------|------------------|-----------------|---------------|------------------|------------------|------------------|----------------|
| Cataluña             | 27,2 (24,7-29,9) | 17,9 (14,7-21,7) | 4,7 (3,3-6,7)   | 0,5 (0,2-1,1) | 21,7 (19,4-24,2) | 26,0 (22,1-30,4) | 13,9 (11,2-17,2) | 5,4 (3,9-7,5)  |
| Comunidad Valenciana | 30,6 (27,5-33,9) | 25,7 (21,4-30,5) | 10,5 (7,7-14,3) | 0,8 (0,3-1,9) | 24,2 (21,3-27,3) | 24,0 (19,6-29,0) | 12,6 (9,4-16,7)  | 5,3 (3,5-7,9)  |
| Extremadura          | 31,5 (27,1-36,2) | 23,8 (18,2-30,6) | 6,0 (3,6-9,9)   | 0,8 (0,2-3,2) | 23,9 (20,0-28,3) | 20,4 (15,2-26,9) | 7,1 (4,2-11,6)   | 2,5 (1,2-5,0)  |
| Galicia              | 26,2 (22,7-30,1) | 17,2 (13,4-21,9) | 3,6 (2,1-6,3)   | 0,5 (0,2-1,6) | 18,3 (15,4-21,7) | 18,8 (14,8-23,6) | 7,7 (5,2-11,3)   | 5,7 (3,8-8,5)  |
| Madrid               | 26,9 (24,3-29,6) | 23,1 (19,4-27,3) | 8,0 (5,9-10,8)  | 4,6 (2,9-7,1) | 25,5 (23,0-28,1) | 28,4 (24,2-33,1) | 19,7 (16,2-23,9) | 9,0 (6,6-12,3) |
| Murcia               | 31,4 (27,5-35,7) | 22,2 (16,9-28,6) | 7,3 (3,6-14,0)  | 0,3 (0,0-2,2) | 19,1 (16,0-22,7) | 16,5 (11,9-22,5) | 5,6 (2,9-10,8)   | 1,8 (0,5-5,7)  |
| Navarra              | 25,7 (21,6-30,1) | 19,7 (14,6-25,9) | 13,1 (8,8-19,1) | 1,1 (0,2-5,6) | 24,7 (20,7-29,2) | 35,4 (28,6-42,9) | 13,4 (9,2-19,1)  | 7,6 (4,6-12,4) |
| País Vasco           | 27,6 (24,2-31,2) | 21,4 (17,1-26,5) | 8,7 (5,6-13,1)  | 2,8 (1,5-5,3) | 29,1 (25,7-32,8) | 29,9 (24,9-35,3) | 17,0 (12,7-22,3) | 4,4 (2,7-7,1)  |
| La Rioja             | 30,8 (25,9-36,1) | 25,0 (18,1-33,4) | 9,7 (5,7-16,1)  | 0,4 (0,1-2,9) | 21,3 (17,2-26,1) | 24,4 (17,6-33,0) | 8,6 (5,1-14,0)   | 6,0 (3,3-10,7) |

IC95%: intervalo de confianza del 95%.

Las prevalencias proceden de la estimación de los datos combinados de la Encuesta Nacional de Salud de España 2011-2012<sup>2</sup> y 2016-2017<sup>3</sup> y de la Encuesta Europea de Salud para España 2014-2015<sup>4</sup>.



**Tabla 3 del material adicional**

Número de muertes atribuidas al consumo de tabaco y fracciones atribuidas poblacionales en cada comunidad autónoma de España en 2017

**3.1. Número de muertes atribuidas al consumo de tabaco y fracciones atribuidas poblacionales en Andalucía, 2017**

|                                           | Varones               |       |      |       |      |       |      |      |      |       | Mujeres               |      |       |      |       |      |      |      |  |  |
|-------------------------------------------|-----------------------|-------|------|-------|------|-------|------|------|------|-------|-----------------------|------|-------|------|-------|------|------|------|--|--|
|                                           | Grupos de edad (años) |       |      |       |      |       |      |      |      |       | Grupos de edad (años) |      |       |      |       |      |      |      |  |  |
|                                           | Total                 | 35-54 |      | 55-64 |      | 65-74 |      | ≥ 75 |      | Total | 35-54                 |      | 55-64 |      | 65-74 |      | ≥ 75 |      |  |  |
|                                           | MA                    | FAP   | MA   | FAP   | MA   | FAP   | MA   | FAP  | MA   | FAP   | MA                    | FAP  | MA    | FAP  | MA    | FAP  | MA   | FAP  |  |  |
| Cáncer de tráquea-bronquios-pulmón        | 2.559                 | 192   | 0,86 | 537   | 0,88 | 904   | 0,89 | 926  | 0,85 | 406   | 86                    | 0,81 | 153   | 0,83 | 107   | 0,65 | 59   | 0,31 |  |  |
| Otros cánceres <sup>a</sup>               | 1.284                 | 98    | 0,27 | 223   | 0,28 | 399   | 0,33 | 564  | 0,29 | 172   | 25                    | 0,13 | 81    | 0,23 | 39    | 0,08 | 27   | 0,02 |  |  |
| Cardiopatía isquémica                     | 1.132                 | 157   | 0,57 | 202   | 0,45 | 306   | 0,38 | 467  | 0,23 | 173   | 31                    | 0,61 | 34    | 0,35 | 44    | 0,16 | 65   | 0,03 |  |  |
| Otras enfermedades cardiacas <sup>b</sup> | 628                   | 74    | 0,35 | 104   | 0,41 | 124   | 0,28 | 326  | 0,14 | 162   | 23                    | 0,32 | 22    | 0,19 | 24    | 0,07 | 93   | 0,02 |  |  |
| Enfermedad cerebrovascular                | 394                   | 34    | 0,35 | 74    | 0,41 | 100   | 0,25 | 187  | 0,11 | 83    | 15                    | 0,32 | 17    | 0,19 | 21    | 0,09 | 31   | 0,01 |  |  |

|                                            |       |    |      |    |      |     |      |       |      |     |       |      |    |      |    |      |    |       |
|--------------------------------------------|-------|----|------|----|------|-----|------|-------|------|-----|-------|------|----|------|----|------|----|-------|
| Otras enfermedades vasculares <sup>c</sup> | 253   | 9  | 0,35 | 24 | 0,41 | 71  | 0,64 | 148   | 0,47 | 40  | 1     | 0,32 | 3  | 0,19 | 11 | 0,31 | 25 | 0,09  |
| Diabetes mellitus                          | 78    | 8  | 0,35 | 21 | 0,41 | 33  | 0,27 | 17    | 0,03 | 16  | 3     | 0,32 | 5  | 0,19 | 5  | 0,06 | 3  | 0,004 |
| Influenza-neumonía-tuberculosis            | 287   | 19 | 0,62 | 52 | 0,85 | 47  | 0,38 | 169   | 0,24 | 41  | 9     | 0,66 | 14 | 0,72 | 4  | 0,07 | 15 | 0,02  |
| Enfermedad pulmonar obstructiva crónica    | 1.603 | 21 | 0,62 | 80 | 0,85 | 312 | 0,90 | 1.191 | 0,85 | 157 | 5     | 0,65 | 17 | 0,65 | 43 | 0,79 | 93 | 0,32  |
| Total                                      | 8.218 |    |      |    |      |     |      |       |      |     | 1.251 |      |    |      |    |      |    |       |

### 3.2. Número de muertes atribuidas al consumo de tabaco y fracciones atribuidas poblacionales en Aragón, 2017

|                                    | Varones               |       |      |       |      |       |      |      |      |       | Mujeres               |      |       |      |       |      |      |      |  |  |
|------------------------------------|-----------------------|-------|------|-------|------|-------|------|------|------|-------|-----------------------|------|-------|------|-------|------|------|------|--|--|
|                                    | Grupos de edad (años) |       |      |       |      |       |      |      |      |       | Grupos de edad (años) |      |       |      |       |      |      |      |  |  |
|                                    | Total                 | 35-54 |      | 55-64 |      | 65-74 |      | ≥ 75 |      | Total | 35-54                 |      | 55-64 |      | 65-74 |      | ≥ 75 |      |  |  |
|                                    | MA                    | FAP   | MA   | FAP   | MA   | FAP   | MA   | FAP  | MA   | FAP   | MA                    | FAP  | MA    | FAP  | MA    | FAP  | MA   | FAP  |  |  |
| Cáncer de tráquea-bronquios-pulmón | 536                   | 34    | 0,85 | 11    | 0,87 | 18    | 0,90 | 200  | 0,81 | 92    | 21                    | 0,81 | 32    | 0,83 | 23    | 0,76 | 15   | 0,29 |  |  |
| Otros cánceres <sup>a</sup>        | 259                   | 13    | 0,27 | 36    | 0,28 | 73    | 0,35 | 137  | 0,25 | 36    | 4                     | 0,13 | 13    | 0,23 | 13    | 0,13 | 7    | 0,02 |  |  |
| Cardiopatía isquémica              | 169                   | 23    | 0,56 | 35    | 0,45 | 31    | 0,40 | 80   | 0,19 | 28    | 4                     | 0,61 | 4     | 0,35 | 9     | 0,24 | 10   | 0,03 |  |  |





**3.4. Número de muertes atribuidas al consumo de tabaco y fracciones atribuidas poblacionales en Islas Baleares, 2017**

|                                            | Varones               |       |      |       |      | Mujeres |      |      |      |       |                       |      |       |      |       |      |      |       |  |  |
|--------------------------------------------|-----------------------|-------|------|-------|------|---------|------|------|------|-------|-----------------------|------|-------|------|-------|------|------|-------|--|--|
|                                            | Grupos de edad (años) |       |      |       |      |         |      |      |      |       | Grupos de edad (años) |      |       |      |       |      |      |       |  |  |
|                                            | Total                 | 35-54 |      | 55-64 |      | 65-74   |      | ≥ 75 |      | Total | 35-54                 |      | 55-64 |      | 65-74 |      | ≥ 75 |       |  |  |
|                                            | MA                    | FAP   | MA   | FAP   | MA   | FAP     | MA   | FAP  | MA   | FAP   | MA                    | FAP  | MA    | FAP  | MA    | FAP  | MA   | FAP   |  |  |
| Cáncer de tráquea-bronquios-pulmón         | 344                   | 31    | 0,85 | 64    | 0,86 | 136     | 0,89 | 112  | 0,85 | 91    | 16                    | 0,80 | 33    | 0,81 | 27    | 0,71 | 15   | 0,44  |  |  |
| Otros cánceres <sup>a</sup>                | 151                   | 15    | 0,26 | 28    | 0,26 | 47      | 0,33 | 60   | 0,29 | 27    | 3                     | 0,12 | 10    | 0,21 | 7     | 0,10 | 7    | 0,04  |  |  |
| Cardiopatía isquémica                      | 120                   | 11    | 0,55 | 22    | 0,43 | 29      | 0,38 | 58   | 0,23 | 22    | 3                     | 0,60 | 4     | 0,31 | 4     | 0,20 | 12   | 0,05  |  |  |
| Otras enfermedades cardiacas <sup>b</sup>  | 64                    | 7     | 0,33 | 8     | 0,38 | 15      | 0,27 | 34   | 0,14 | 24    | 1                     | 0,30 | 2     | 0,17 | 3     | 0,10 | 18   | 0,04  |  |  |
| Enfermedad cerebrovascular                 | 35                    | 5     | 0,33 | 5     | 0,38 | 8       | 0,24 | 18   | 0,11 | 9     | 2                     | 0,30 | 2     | 0,17 | 2     | 0,11 | 4    | 0,02  |  |  |
| Otras enfermedades vasculares <sup>c</sup> | 21                    | 1     | 0,33 | 2     | 0,38 | 6       | 0,63 | 12   | 0,47 | 6     | 0                     | 0,30 | 0     | 0,17 | 2     | 0,37 | 4    | 0,13  |  |  |
| Diabetes mellitus                          | 17                    | 1     | 0,33 | 5     | 0,38 | 8       | 0,28 | 3    | 0,03 | 3     | 1                     | 0,30 | 1     | 0,17 | 1     | 0,08 | 1    | 0,008 |  |  |

|                                         |     |   |      |   |      |    |      |     |      |     |   |      |   |      |    |      |    |      |
|-----------------------------------------|-----|---|------|---|------|----|------|-----|------|-----|---|------|---|------|----|------|----|------|
| Influenza-neumonía-tuberculosis         | 25  | 1 | 0,60 | 5 | 0,83 | 3  | 0,38 | 17  | 0,23 | 4   | 1 | 0,64 | 1 | 0,72 | 0  | 0,09 | 2  | 0,03 |
| Enfermedad pulmonar obstructiva crónica | 165 | 4 | 0,60 | 7 | 0,83 | 34 | 0,90 | 120 | 0,85 | 46  | 0 | 0,62 | 4 | 0,60 | 15 | 0,83 | 27 | 0,46 |
| Total                                   | 942 |   |      |   |      |    |      |     |      | 231 |   |      |   |      |    |      |    |      |

**3.5. Número de muertes atribuidas al consumo de tabaco y fracciones atribuidas poblacionales en Canarias, 2017**

|                                           | Varones               |       |      |       |      |       |      |      |      |       | Mujeres |      |       |      |       |      |      |      |  |  |
|-------------------------------------------|-----------------------|-------|------|-------|------|-------|------|------|------|-------|---------|------|-------|------|-------|------|------|------|--|--|
|                                           | Grupos de edad (años) |       |      |       |      |       |      |      |      |       |         |      |       |      |       |      |      |      |  |  |
|                                           | Total                 | 35-54 |      | 55-64 |      | 65-74 |      | ≥ 75 |      | Total | 35-54   |      | 55-64 |      | 65-74 |      | ≥ 75 |      |  |  |
|                                           | MA                    | FAP   | MA   | FAP   | MA   | FAP   | MA   | FAP  | MA   | FAP   | MA      | FAP  | MA    | FAP  | MA    | FAP  | MA   | FAP  |  |  |
| Cáncer de tráquea-bronquios-pulmón        | 580                   | 51    | 0,84 | 127   | 0,87 | 205   | 0,88 | 196  | 0,86 | 168   | 20      | 0,79 | 69    | 0,81 | 39    | 0,76 | 40   | 0,51 |  |  |
| Otros cánceres <sup>a</sup>               | 302                   | 25    | 0,25 | 47    | 0,28 | 100   | 0,32 | 129  | 0,3  | 51    | 6       | 0,11 | 17    | 0,21 | 16    | 0,13 | 12   | 0,05 |  |  |
| Cardiopatía isquémica                     | 290                   | 40    | 0,54 | 62    | 0,45 | 78    | 0,37 | 110  | 0,24 | 68    | 10      | 0,57 | 13    | 0,32 | 19    | 0,24 | 27   | 0,06 |  |  |
| Otras enfermedades cardíacas <sup>b</sup> | 121                   | 14    | 0,33 | 23    | 0,40 | 22    | 0,26 | 62   | 0,15 | 45    | 5       | 0,29 | 6     | 0,17 | 8     | 0,11 | 27   | 0,04 |  |  |

|                                            |       |   |      |    |      |    |      |     |      |     |   |      |   |      |    |      |    |       |
|--------------------------------------------|-------|---|------|----|------|----|------|-----|------|-----|---|------|---|------|----|------|----|-------|
| Enfermedad cerebrovascular                 | 66    | 8 | 0,33 | 16 | 0,40 | 14 | 0,23 | 28  | 0,12 | 23  | 3 | 0,29 | 4 | 0,17 | 6  | 0,14 | 10 | 0,03  |
| Otras enfermedades vasculares <sup>c</sup> | 51    | 2 | 0,33 | 6  | 0,40 | 15 | 0,61 | 28  | 0,49 | 16  | 1 | 0,29 | 1 | 0,17 | 6  | 0,43 | 9  | 0,18  |
| Diabetes mellitus                          | 25    | 3 | 0,33 | 7  | 0,40 | 11 | 0,27 | 4   | 0,03 | 6   | 1 | 0,29 | 1 | 0,17 | 2  | 0,09 | 1  | 0,007 |
| Influenza-neumonía-tuberculosis            | 73    | 4 | 0,60 | 11 | 0,84 | 11 | 0,36 | 47  | 0,24 | 18  | 3 | 0,63 | 4 | 0,69 | 1  | 0,10 | 10 | 0,05  |
| Enfermedad pulmonar obstructiva crónica    | 324   | 2 | 0,60 | 24 | 0,84 | 60 | 0,89 | 238 | 0,86 | 72  | 3 | 0,61 | 6 | 0,62 | 10 | 0,85 | 53 | 0,51  |
| Total                                      | 1.831 |   |      |    |      |    |      |     |      | 467 |   |      |   |      |    |      |    |       |

**3.6. Número de muertes atribuidas al consumo de tabaco y fracciones atribuidas poblacionales en Cantabria, 2017**

|                                    | Varones               |       |       |       |      |       |       |       |       |      | Mujeres               |       |       |       |      |       |       |       |       |      |     |  |
|------------------------------------|-----------------------|-------|-------|-------|------|-------|-------|-------|-------|------|-----------------------|-------|-------|-------|------|-------|-------|-------|-------|------|-----|--|
|                                    | Grupos de edad (años) |       |       |       |      |       |       |       |       |      | Grupos de edad (años) |       |       |       |      |       |       |       |       |      |     |  |
|                                    | Total                 | 35-54 | 55-64 | 65-74 | ≥ 75 | Total | 35-54 | 55-64 | 65-74 | ≥ 75 | Total                 | 35-54 | 55-64 | 65-74 | ≥ 75 | Total | 35-54 | 55-64 | 65-74 | ≥ 75 |     |  |
|                                    | MA                    | FAP   | MA    | FAP   | MA   | FAP   | MA    | FAP   | MA    | FAP  |                       | MA    | FAP   | MA    | FAP  | MA    | FAP   | MA    | FAP   | MA   | FAP |  |
| Cáncer de tráquea-bronquios-pulmón | 227                   | 9     | 0,85  | 60    | 0,86 | 70    | 0,87  | 86    | 0,83  | 56   | 5                     | 0,79  | 29    | 0,83  | 16   | 0,78  | 6     | 0,20  |       |      |     |  |

|                                               |     |   |      |    |      |    |      |    |      |    |     |      |   |      |   |      |   |       |
|-----------------------------------------------|-----|---|------|----|------|----|------|----|------|----|-----|------|---|------|---|------|---|-------|
| Otros cánceres <sup>a</sup>                   | 115 | 6 | 0,26 | 18 | 0,26 | 35 | 0,29 | 57 | 0,27 | 20 | 2   | 0,12 | 8 | 0,23 | 8 | 0,14 | 2 | 0,01  |
| Cardiopatía isquémica                         | 60  | 9 | 0,56 | 13 | 0,43 | 10 | 0,34 | 28 | 0,21 | 8  | 1   | 0,58 | 1 | 0,36 | 4 | 0,26 | 2 | 0,02  |
| Otras enfermedades<br>cardiacas <sup>b</sup>  | 49  | 4 | 0,35 | 9  | 0,38 | 12 | 0,23 | 23 | 0,12 | 7  | 0   | 0,29 | 1 | 0,20 | 2 | 0,12 | 4 | 0,01  |
| Enfermedad<br>cerebrovascular                 | 25  | 2 | 0,35 | 4  | 0,38 | 5  | 0,20 | 14 | 0,1  | 7  | 2   | 0,29 | 2 | 0,20 | 2 | 0,15 | 1 | 0,01  |
| Otras enfermedades<br>vasculares <sup>c</sup> | 23  | 0 | 0,35 | 1  | 0,38 | 6  | 0,57 | 16 | 0,43 | 4  | 0   | 0,29 | 0 | 0,20 | 2 | 0,46 | 1 | 0,05  |
| Diabetes mellitus                             | 4   | 0 | 0,35 | 2  | 0,38 | 2  | 0,26 | 1  | 0,03 | 1  | 0   | 0,29 | 0 | 0,20 | 0 | 0,09 | 0 | 0,002 |
| Influenza-neumonía-<br>tuberculosis           | 18  | 1 | 0,61 | 2  | 0,83 | 1  | 0,34 | 14 | 0,23 | 1  | 0   | 0,63 | 0 | 0,72 | 0 | 0,11 | 1 | 0,01  |
| Enfermedad pulmonar<br>obstructiva crónica    | 114 | 1 | 0,61 | 3  | 0,83 | 11 | 0,87 | 98 | 0,83 | 17 | 1   | 0,61 | 3 | 0,65 | 5 | 0,86 | 8 | 0,21  |
| Total                                         | 635 |   |      |    |      |    |      |    |      |    | 119 |      |   |      |   |      |   |       |

**3.7. Número de muertes atribuidas al consumo de tabaco y fracciones atribuidas poblacionales en Castilla y León, 2017**

Varones

Mujeres



|                                            | Grupos de edad (años) |       |      |       |      |       |      |      |      |       | Grupos de edad (años) |      |       |      |       |      |      |       |  |  |
|--------------------------------------------|-----------------------|-------|------|-------|------|-------|------|------|------|-------|-----------------------|------|-------|------|-------|------|------|-------|--|--|
|                                            | Total                 | 35-54 |      | 55-64 |      | 65-74 |      | ≥ 75 |      | Total | 35-54                 |      | 55-64 |      | 65-74 |      | ≥ 75 |       |  |  |
|                                            |                       | MA    | FAP  | MA    | FAP  | MA    | FAP  | MA   | FAP  |       | MA                    | FAP  | MA    | FAP  | MA    | FAP  | MA   | FAP   |  |  |
| Cáncer de tráquea-bronquios-pulmón         | 895                   | 39    | 0,85 | 176   | 0,87 | 305   | 0,89 | 376  | 0,82 | 157   | 19                    | 0,81 | 61    | 0,85 | 50    | 0,73 | 28   | 0,24  |  |  |
| Otros cánceres <sup>a</sup>                | 557                   | 24    | 0,26 | 82    | 0,29 | 164   | 0,33 | 287  | 0,25 | 64    | 10                    | 0,13 | 23    | 0,25 | 20    | 0,11 | 11   | 0,01  |  |  |
| Cardiopatía isquémica                      | 349                   | 46    | 0,55 | 58    | 0,45 | 73    | 0,38 | 172  | 0,20 | 47    | 12                    | 0,61 | 9     | 0,38 | 10    | 0,21 | 16   | 0,02  |  |  |
| Otras enfermedades cardíacas <sup>b</sup>  | 190                   | 11    | 0,33 | 30    | 0,41 | 35    | 0,28 | 114  | 0,11 | 40    | 4                     | 0,31 | 5     | 0,21 | 5     | 0,10 | 25   | 0,01  |  |  |
| Enfermedad cerebrovascular                 | 94                    | 5     | 0,33 | 13    | 0,41 | 18    | 0,25 | 58   | 0,09 | 19    | 3                     | 0,31 | 4     | 0,21 | 5     | 0,12 | 7    | 0,01  |  |  |
| Otras enfermedades vasculares <sup>c</sup> | 98                    | 1     | 0,33 | 4     | 0,41 | 27    | 0,64 | 66   | 0,40 | 11    | 0                     | 0,31 | 0     | 0,21 | 4     | 0,40 | 7    | 0,06  |  |  |
| Diabetes mellitus                          | 31                    | 2     | 0,33 | 7     | 0,41 | 13    | 0,27 | 9    | 0,03 | 5     | 1                     | 0,31 | 2     | 0,21 | 1     | 0,08 | 1    | 0,002 |  |  |
| Influenza-neumonía-tuberculosis            | 102                   | 7     | 0,61 | 5     | 0,85 | 10    | 0,38 | 80   | 0,22 | 10    | 3                     | 0,65 | 1     | 0,75 | 1     | 0,09 | 5    | 0,01  |  |  |
| Enfermedad pulmonar obstructiva crónica    | 540                   | 5     | 0,61 | 22    | 0,85 | 81    | 0,90 | 433  | 0,82 | 47    | 1                     | 0,64 | 3     | 0,68 | 10    | 0,84 | 33   | 0,24  |  |  |
| Total                                      | 2.856                 |       |      |       |      |       |      |      |      |       |                       | 400  |       |      |       |      |      |       |  |  |

**3.8. Número de muertes atribuidas al consumo de tabaco y fracciones atribuidas poblacionales en Castilla-La Mancha, 2017**

|                                            | Varones               |       |      |       |      |       |      |      |      |       | Mujeres               |      |       |      |       |      |      |       |  |  |
|--------------------------------------------|-----------------------|-------|------|-------|------|-------|------|------|------|-------|-----------------------|------|-------|------|-------|------|------|-------|--|--|
|                                            | Grupos de edad (años) |       |      |       |      |       |      |      |      |       | Grupos de edad (años) |      |       |      |       |      |      |       |  |  |
|                                            | Total                 | 35-54 |      | 55-64 |      | 65-74 |      | ≥ 75 |      | Total | 35-54                 |      | 55-64 |      | 65-74 |      | ≥ 75 |       |  |  |
|                                            | MA                    | FAP   | MA   | FAP   | MA   | FAP   | MA   | FAP  | MA   | FAP   | MA                    | FAP  | MA    | FAP  | MA    | FAP  | MA   | FAP   |  |  |
| Cáncer de tráquea-bronquios-pulmón         | 722                   | 59    | 0,85 | 128   | 0,87 | 237   | 0,89 | 298  | 0,83 | 87    | 21                    | 0,80 | 36    | 0,80 | 17    | 0,57 | 13   | 0,22  |  |  |
| Otros cánceres <sup>a</sup>                | 355                   | 25    | 0,27 | 48    | 0,28 | 94    | 0,33 | 187  | 0,26 | 31    | 6                     | 0,12 | 13    | 0,20 | 6     | 0,06 | 5    | 0,01  |  |  |
| Cardiopatía isquémica                      | 213                   | 28    | 0,56 | 37    | 0,44 | 46    | 0,38 | 103  | 0,20 | 22    | 5                     | 0,60 | 5     | 0,31 | 3     | 0,12 | 9    | 0,02  |  |  |
| Otras enfermedades cardíacas <sup>b</sup>  | 132                   | 14    | 0,35 | 14    | 0,40 | 27    | 0,28 | 76   | 0,12 | 21    | 4                     | 0,30 | 3     | 0,17 | 2     | 0,05 | 12   | 0,01  |  |  |
| Enfermedad cerebrovascular                 | 77                    | 5     | 0,35 | 15    | 0,40 | 17    | 0,25 | 41   | 0,10 | 12    | 3                     | 0,30 | 2     | 0,17 | 2     | 0,07 | 5    | 0,01  |  |  |
| Otras enfermedades vasculares <sup>c</sup> | 58                    | 1     | 0,35 | 5     | 0,40 | 13    | 0,63 | 39   | 0,42 | 7     | 0                     | 0,30 | 1     | 0,17 | 2     | 0,25 | 5    | 0,06  |  |  |
| Diabetes mellitus                          | 28                    | 4     | 0,35 | 8     | 0,40 | 10    | 0,27 | 6    | 0,03 | 3     | 1                     | 0,30 | 1     | 0,17 | 1     | 0,04 | 0    | 0,013 |  |  |
| Influenza-neumonía-tuberculosis            | 85                    | 2     | 0,62 | 5     | 0,84 | 8     | 0,38 | 70   | 0,22 | 7     | 1                     | 0,65 | 1     | 0,67 | 0     | 0,05 | 5    | 0,21  |  |  |

|                                         |       |   |      |    |      |    |      |     |      |    |     |      |   |      |   |      |    |       |
|-----------------------------------------|-------|---|------|----|------|----|------|-----|------|----|-----|------|---|------|---|------|----|-------|
| Enfermedad pulmonar obstructiva crónica | 590   | 3 | 0,62 | 24 | 0,84 | 87 | 0,90 | 476 | 0,83 | 37 | 2   | 0,63 | 2 | 0,61 | 6 | 0,72 | 27 | 0,002 |
| Total                                   | 2.260 |   |      |    |      |    |      |     |      |    | 228 |      |   |      |   |      |    |       |

**3.9. Número de muertes atribuidas al consumo de tabaco y fracciones atribuidas poblacionales en Cataluña, 2017**

|                                            | Varones               |       |      |       |      |       |      |      |      |       | Mujeres |      |       |      |       |      |      |       |    |     |
|--------------------------------------------|-----------------------|-------|------|-------|------|-------|------|------|------|-------|---------|------|-------|------|-------|------|------|-------|----|-----|
|                                            | Grupos de edad (años) |       |      |       |      |       |      |      |      |       |         |      |       |      |       |      |      |       |    |     |
|                                            | Total                 | 35-54 |      | 55-64 |      | 65-74 |      | ≥ 75 |      | Total | 35-54   |      | 55-64 |      | 65-74 |      | ≥ 75 |       |    |     |
|                                            | MA                    | FAP   | MA   | FAP   | MA   | FAP   | MA   | FAP  | MA   | FAP   | MA      | FAP  | MA    | FAP  | MA    | FAP  | MA   | FAP   | MA | FAP |
| Cáncer de tráquea-bronquios-pulmón         | 2.229                 | 143   | 0,86 | 447   | 0,88 | 773   | 0,89 | 865  | 0,83 | 445   | 87      | 0,79 | 159   | 0,81 | 115   | 0,65 | 84   | 0,28  |    |     |
| Otros cánceres <sup>a</sup>                | 1.226                 | 81    | 0,27 | 212   | 0,28 | 370   | 0,34 | 562  | 0,26 | 147   | 18      | 0,11 | 64    | 0,21 | 37    | 0,08 | 28   | 0,02  |    |     |
| Cardiopatía isquémica                      | 755                   | 88    | 0,57 | 144   | 0,45 | 180   | 0,38 | 342  | 0,21 | 98    | 21      | 0,57 | 16    | 0,31 | 20    | 0,16 | 42   | 0,03  |    |     |
| Otras enfermedades cardíacas <sup>b</sup>  | 488                   | 62    | 0,35 | 85    | 0,41 | 101   | 0,28 | 240  | 0,12 | 118   | 18      | 0,28 | 15    | 0,17 | 16    | 0,08 | 70   | 0,02  |    |     |
| Enfermedad cerebrovascular                 | 244                   | 22    | 0,35 | 48    | 0,41 | 60    | 0,25 | 114  | 0,10 | 46    | 12      | 0,28 | 6     | 0,17 | 12    | 0,09 | 16   | 0,01  |    |     |
| Otras enfermedades vasculares <sup>c</sup> | 229                   | 10    | 0,35 | 16    | 0,41 | 67    | 0,63 | 135  | 0,42 | 31    | 2       | 0,28 | 3     | 0,17 | 7     | 0,31 | 20   | 0,07  |    |     |
| Diabetes mellitus                          | 84                    | 5     | 0,35 | 19    | 0,41 | 41    | 0,28 | 19   | 0,03 | 12    | 2       | 0,28 | 3     | 0,17 | 4     | 0,06 | 3    | 0,004 |    |     |

|                                         |       |    |      |    |      |     |      |       |      |     |       |      |    |      |    |      |     |      |
|-----------------------------------------|-------|----|------|----|------|-----|------|-------|------|-----|-------|------|----|------|----|------|-----|------|
| Influenza-neumonía-tuberculosis         | 219   | 17 | 0,62 | 37 | 0,85 | 26  | 0,38 | 138   | 0,22 | 24  | 8     | 0,62 | 3  | 0,71 | 2  | 0,07 | 11  | 0,02 |
| Enfermedad pulmonar obstructiva crónica | 1.656 | 12 | 0,62 | 62 | 0,85 | 287 | 0,90 | 1.295 | 0,83 | 234 | 7     | 0,60 | 22 | 0,60 | 50 | 0,79 | 155 | 0,29 |
| Total                                   | 7.129 |    |      |    |      |     |      |       |      |     | 1.154 |      |    |      |    |      |     |      |

**3.10. Número de muertes atribuidas al consumo de tabaco y fracciones atribuidas poblacionales en Comunidad Valenciana, 2017**

|                                           | Varones               |       |      |       |      |       |      |      |      |       | Mujeres |      |       |      |       |      |      |      |  |  |
|-------------------------------------------|-----------------------|-------|------|-------|------|-------|------|------|------|-------|---------|------|-------|------|-------|------|------|------|--|--|
|                                           | Grupos de edad (años) |       |      |       |      |       |      |      |      |       |         |      |       |      |       |      |      |      |  |  |
|                                           | Total                 | 35-54 |      | 55-64 |      | 65-74 |      | ≥ 75 |      | Total | 35-54   |      | 55-64 |      | 65-74 |      | ≥ 75 |      |  |  |
|                                           |                       | MA    | FAP  | MA    | FAP  | MA    | FAP  | MA   | FAP  |       | MA      | FAP  | MA    | FAP  | MA    | FAP  | MA   | FAP  |  |  |
| Cáncer de tráquea-bronquios-pulmón        | 1.678                 | 130   | 0,85 | 357   | 0,88 | 568   | 0,90 | 624  | 0,84 | 346   | 61      | 0,81 | 120   | 0,85 | 112   | 0,76 | 52   | 0,32 |  |  |
| Otros cánceres <sup>a</sup>               | 839                   | 55    | 0,27 | 134   | 0,28 | 261   | 0,35 | 389  | 0,27 | 138   | 17      | 0,13 | 60    | 0,26 | 42    | 0,13 | 20   | 0,02 |  |  |
| Cardiopatía isquémica                     | 680                   | 83    | 0,56 | 117   | 0,45 | 169   | 0,40 | 311  | 0,22 | 103   | 14      | 0,60 | 18    | 0,39 | 31    | 0,24 | 40   | 0,03 |  |  |
| Otras enfermedades cardíacas <sup>b</sup> | 347                   | 43    | 0,35 | 58    | 0,40 | 61    | 0,29 | 186  | 0,13 | 103   | 13      | 0,31 | 11    | 0,22 | 17    | 0,11 | 61   | 0,02 |  |  |
| Enfermedad cerebrovascular                | 204                   | 26    | 0,35 | 34    | 0,40 | 52    | 0,27 | 91   | 0,10 | 55    | 14      | 0,31 | 10    | 0,22 | 16    | 0,14 | 15   | 0,01 |  |  |

|                                            |       |    |      |    |      |     |      |     |      |     |     |      |    |      |    |      |    |       |
|--------------------------------------------|-------|----|------|----|------|-----|------|-----|------|-----|-----|------|----|------|----|------|----|-------|
| Otras enfermedades vasculares <sup>c</sup> | 164   | 4  | 0,35 | 13 | 0,40 | 47  | 0,66 | 101 | 0,45 | 27  | 2   | 0,31 | 2  | 0,22 | 10 | 0,44 | 12 | 0,08  |
| Diabetes mellitus                          | 47    | 2  | 0,35 | 14 | 0,40 | 20  | 0,27 | 11  | 0,03 | 11  | 2   | 0,31 | 3  | 0,22 | 4  | 0,09 | 2  | 0,004 |
| Influenza-neumonía-tuberculosis            | 164   | 14 | 0,62 | 13 | 0,85 | 27  | 0,39 | 110 | 0,23 | 19  | 3   | 0,65 | 4  | 0,75 | 2  | 0,10 | 10 | 0,02  |
| Enfermedad pulmonar obstructiva crónica    | 907   | 3  | 0,62 | 42 | 0,85 | 178 | 0,91 | 684 | 0,84 | 135 | 4   | 0,63 | 14 | 0,68 | 41 | 0,85 | 77 | 0,32  |
| Total                                      | 5.031 |    |      |    |      |     |      |     |      |     | 936 |      |    |      |    |      |    |       |

**3.11. Número de muertes atribuidas al consumo de tabaco y fracciones atribuidas poblacionales en Extremadura, 2017**

|                                    | Varones               |       |      |       |      |       |      |      |      |       | Mujeres |      |       |      |       |      |      |      |  |  |
|------------------------------------|-----------------------|-------|------|-------|------|-------|------|------|------|-------|---------|------|-------|------|-------|------|------|------|--|--|
|                                    | Grupos de edad (años) |       |      |       |      |       |      |      |      |       |         |      |       |      |       |      |      |      |  |  |
|                                    | Total                 | 35-54 |      | 55-64 |      | 65-74 |      | ≥ 75 |      | Total | 35-54   |      | 55-64 |      | 65-74 |      | ≥ 75 |      |  |  |
|                                    | MA                    | FAP   | MA   | FAP   | MA   | FAP   | MA   | FAP  | MA   | FAP   | MA      | FAP  | MA    | FAP  | MA    | FAP  | MA   | FAP  |  |  |
| Cáncer de tráquea-bronquios-pulmón | 477                   | 31    | 0,86 | 99    | 0,88 | 159   | 0,91 | 188  | 0,85 | 49    | 11      | 0,81 | 12    | 0,84 | 18    | 0,64 | 9    | 0,23 |  |  |
| Otros cánceres <sup>a</sup>        | 244                   | 15    | 0,29 | 30    | 0,30 | 75    | 0,37 | 124  | 0,30 | 22    | 2       | 0,13 | 11    | 0,24 | 6     | 0,08 | 4    | 0,01 |  |  |
| Cardiopatía isquémica              | 167                   | 19    | 0,58 | 29    | 0,47 | 40    | 0,42 | 80   | 0,24 | 16    | 2       | 0,61 | 3     | 0,37 | 4     | 0,15 | 7    | 0,02 |  |  |

|                                            |       |   |      |    |      |    |      |     |      |    |     |      |   |      |   |      |    |       |
|--------------------------------------------|-------|---|------|----|------|----|------|-----|------|----|-----|------|---|------|---|------|----|-------|
| Otras enfermedades cardíacas <sup>b</sup>  | 95    | 9 | 0,36 | 11 | 0,42 | 20 | 0,32 | 55  | 0,14 | 17 | 2   | 0,31 | 2 | 0,20 | 3 | 0,07 | 10 | 0,01  |
| Enfermedad cerebrovascular                 | 61    | 6 | 0,36 | 11 | 0,42 | 13 | 0,29 | 32  | 0,11 | 8  | 1   | 0,31 | 2 | 0,20 | 2 | 0,09 | 3  | 0,01  |
| Otras enfermedades vasculares <sup>c</sup> | 39    | 1 | 0,36 | 2  | 0,42 | 12 | 0,68 | 24  | 0,46 | 3  | 0   | 0,31 | 0 | 0,20 | 1 | 0,30 | 2  | 0,06  |
| Diabetes mellitus                          | 11    | 2 | 0,36 | 1  | 0,42 | 5  | 0,29 | 3   | 0,04 | 1  | 0   | 0,31 | 0 | 0,20 | 0 | 0,05 | 0  | 0,002 |
| Influenza-neumonía-tuberculosis            | 77    | 1 | 0,63 | 11 | 0,86 | 12 | 0,41 | 52  | 0,26 | 8  | 1   | 0,66 | 4 | 0,73 | 0 | 0,06 | 3  | 0,01  |
| Enfermedad pulmonar obstructiva crónica    | 254   | 3 | 0,63 | 15 | 0,86 | 38 | 0,91 | 198 | 0,85 | 12 | 2   | 0,64 | 1 | 0,66 | 3 | 0,77 | 6  | 0,23  |
| Total                                      | 1.426 |   |      |    |      |    |      |     |      |    | 136 |      |   |      |   |      |    |       |

**3.12. Número de muertes atribuidas al consumo de tabaco y fracciones atribuidas poblacionales en Galicia, 2017**

|                                    | Varones               |       |      |       |      |       |      |      |      |       | Mujeres               |      |       |      |       |      |      |      |  |  |
|------------------------------------|-----------------------|-------|------|-------|------|-------|------|------|------|-------|-----------------------|------|-------|------|-------|------|------|------|--|--|
|                                    | Grupos de edad (años) |       |      |       |      |       |      |      |      |       | Grupos de edad (años) |      |       |      |       |      |      |      |  |  |
|                                    | Total                 | 35-54 |      | 55-64 |      | 65-74 |      | ≥ 75 |      | Total | 35-54                 |      | 55-64 |      | 65-74 |      | ≥ 75 |      |  |  |
|                                    | MA                    | FAP   | MA   | FAP   | MA   | FAP   | MA   | FAP  | MA   | FAP   | MA                    | FAP  | MA    | FAP  | MA    | FAP  | MA   | FAP  |  |  |
| Cáncer de tráquea-bronquios-pulmón | 1.038                 | 62    | 0,84 | 223   | 0,86 | 376   | 0,89 | 376  | 0,81 | 185   | 37                    | 0,78 | 69    | 0,79 | 41    | 0,56 | 38   | 0,30 |  |  |
| Otros cánceres <sup>a</sup>        | 568                   | 35    | 0,26 | 92    | 0,26 | 181   | 0,32 | 260  | 0,23 | 62    | 8                     | 0,11 | 24    | 0,19 | 13    | 0,06 | 18   | 0,02 |  |  |

|                                            |       |    |      |    |      |    |      |     |      |     |     |      |   |      |    |      |    |       |
|--------------------------------------------|-------|----|------|----|------|----|------|-----|------|-----|-----|------|---|------|----|------|----|-------|
| Cardiopatía isquémica                      | 345   | 38 | 0,54 | 53 | 0,42 | 90 | 0,37 | 164 | 0,18 | 51  | 12  | 0,56 | 8 | 0,30 | 7  | 0,11 | 24 | 0,03  |
| Otras enfermedades cardíacas <sup>b</sup>  | 230   | 17 | 0,32 | 30 | 0,37 | 50 | 0,27 | 133 | 0,11 | 62  | 5   | 0,27 | 6 | 0,16 | 5  | 0,05 | 47 | 0,02  |
| Enfermedad cerebrovascular                 | 105   | 9  | 0,32 | 15 | 0,37 | 25 | 0,24 | 56  | 0,08 | 26  | 6   | 0,27 | 4 | 0,16 | 4  | 0,06 | 11 | 0,01  |
| Otras enfermedades vasculares <sup>c</sup> | 97    | 2  | 0,32 | 9  | 0,37 | 28 | 0,63 | 59  | 0,38 | 16  | 1   | 0,27 | 1 | 0,16 | 3  | 0,24 | 12 | 0,08  |
| Diabetes mellitus                          | 26    | 2  | 0,32 | 7  | 0,37 | 11 | 0,26 | 6   | 0,03 | 3   | 0   | 0,27 | 1 | 0,16 | 1  | 0,04 | 1  | 0,004 |
| Influenza-neumonía-tuberculosis            | 85    | 3  | 0,60 | 10 | 0,83 | 12 | 0,37 | 60  | 0,20 | 12  | 2   | 0,61 | 3 | 0,68 | 1  | 0,05 | 6  | 0,02  |
| Enfermedad pulmonar obstructiva crónica    | 606   | 5  | 0,60 | 22 | 0,83 | 74 | 0,89 | 506 | 0,81 | 101 | 0   | 0,59 | 4 | 0,59 | 11 | 0,72 | 86 | 0,31  |
| Total                                      | 3.099 |    |      |    |      |    |      |     |      |     | 519 |      |   |      |    |      |    |       |

**3.13. Número de muertes atribuidas al consumo de tabaco y fracciones atribuidas poblacionales en Madrid, 2017**

|                                    | Varones               |       |      |       |      |       |      |      |      |       | Mujeres               |      |       |      |       |      |      |      |     |  |
|------------------------------------|-----------------------|-------|------|-------|------|-------|------|------|------|-------|-----------------------|------|-------|------|-------|------|------|------|-----|--|
|                                    | Grupos de edad (años) |       |      |       |      |       |      |      |      |       | Grupos de edad (años) |      |       |      |       |      |      |      |     |  |
|                                    | Total                 | 35-54 |      | 55-64 |      | 65-74 |      | ≥ 75 |      | Total | 35-54                 |      | 55-64 |      | 65-74 |      | ≥ 75 |      |     |  |
|                                    |                       | MA    | FAP  | MA    | FAP  | MA    | FAP  | MA   | FAP  | MA    | FAP                   | MA   | FAP   | MA   | FAP   | MA   | FAP  | MA   | FAP |  |
| Cáncer de tráquea-bronquios-pulmón | 1.609                 | 76    | 0,84 | 307   | 0,87 | 545   | 0,89 | 680  | 0,84 | 501   | 66                    | 0,79 | 155   | 0,84 | 136   | 0,75 | 144  | 0,60 |     |  |





|                                            |       |    |      |    |      |     |      |     |      |    |     |      |    |      |    |      |   |       |
|--------------------------------------------|-------|----|------|----|------|-----|------|-----|------|----|-----|------|----|------|----|------|---|-------|
| Cáncer de tráquea-bronquios-pulmón         | 401   | 36 | 0,85 | 75 | 0,88 | 148 | 0,91 | 141 | 0,81 | 60 | 13  | 0,81 | 25 | 0,82 | 16 | 0,66 | 6 | 0,14  |
| Otros cánceres <sup>a</sup>                | 195   | 15 | 0,26 | 32 | 0,28 | 63  | 0,36 | 84  | 0,24 | 22 | 5   | 0,12 | 9  | 0,22 | 6  | 0,08 | 1 | 0,01  |
| Cardiopatía isquémica                      | 156   | 23 | 0,55 | 32 | 0,45 | 38  | 0,41 | 64  | 0,19 | 14 | 1   | 0,60 | 5  | 0,35 | 4  | 0,17 | 4 | 0,01  |
| Otras enfermedades cardíacas <sup>b</sup>  | 88    | 13 | 0,34 | 16 | 0,40 | 22  | 0,31 | 36  | 0,11 | 15 | 4   | 0,31 | 2  | 0,19 | 4  | 0,07 | 5 | 0,01  |
| Enfermedad cerebrovascular                 | 49    | 3  | 0,34 | 9  | 0,40 | 15  | 0,28 | 22  | 0,09 | 9  | 2   | 0,31 | 2  | 0,19 | 3  | 0,10 | 2 | 0,004 |
| Otras enfermedades vasculares <sup>c</sup> | 33    | 2  | 0,34 | 2  | 0,40 | 11  | 0,67 | 18  | 0,39 | 5  | 1   | 0,31 | 1  | 0,19 | 2  | 0,33 | 1 | 0,03  |
| Diabetes mellitus                          | 16    | 1  | 0,34 | 4  | 0,40 | 8   | 0,28 | 3   | 0,03 | 2  | 1   | 0,31 | 1  | 0,19 | 1  | 0,05 | 0 | 0,001 |
| Influenza-neumonía-tuberculosis            | 46    | 3  | 0,60 | 6  | 0,85 | 6   | 0,40 | 30  | 0,20 | 9  | 3   | 0,65 | 5  | 0,71 | 1  | 0,07 | 1 | 0,01  |
| Enfermedad pulmonar obstructiva crónica    | 306   | 1  | 0,60 | 14 | 0,85 | 47  | 0,91 | 243 | 0,81 | 21 | 2   | 0,64 | 4  | 0,65 | 7  | 0,78 | 9 | 0,15  |
| Total                                      | 1.289 |    |      |    |      |     |      |     |      |    | 157 |      |    |      |    |      |   |       |

**3.15. Número de muertes atribuidas al consumo de tabaco y fracciones atribuidas poblacionales en Navarra, 2017**

Varones

Mujeres

Grupos de edad (años)

Grupos de edad (años)

|                                            | Total | 35-54 |      | 55-64 |      | 65-74 |      | ≥ 75 |      | Total | 35-54 |      | 55-64 |      | 65-74 |      | ≥ 75 |       |  |  |
|--------------------------------------------|-------|-------|------|-------|------|-------|------|------|------|-------|-------|------|-------|------|-------|------|------|-------|--|--|
|                                            |       | MA    | FAP  | MA    | FAP  | MA    | FAP  | MA   | FAP  |       | MA    | FAP  | MA    | FAP  | MA    | FAP  | MA   | FAP   |  |  |
| Cáncer de tráquea-bronquios-pulmón         | 211   | 11    | 0,84 | 48    | 0,87 | 72    | 0,89 | 80   | 0,80 | 44    | 5     | 0,78 | 20    | 0,83 | 12    | 0,79 | 8    | 0,40  |  |  |
| Otros cánceres <sup>a</sup>                | 102   | 5     | 0,26 | 16    | 0,27 | 32    | 0,32 | 49   | 0,22 | 17    | 2     | 0,12 | 5     | 0,24 | 5     | 0,15 | 5    | 0,03  |  |  |
| Cardiopatía isquémica                      | 63    | 7     | 0,55 | 13    | 0,43 | 20    | 0,37 | 24   | 0,18 | 11    | 1     | 0,57 | 1     | 0,34 | 3     | 0,27 | 5    | 0,04  |  |  |
| Otras enfermedades cardíacas <sup>b</sup>  | 35    | 3     | 0,33 | 2     | 0,38 | 7     | 0,27 | 22   | 0,10 | 13    | 1     | 0,27 | 0     | 0,19 | 2     | 0,13 | 9    | 0,03  |  |  |
| Enfermedad cerebrovascular                 | 22    | 2     | 0,33 | 4     | 0,38 | 5     | 0,24 | 11   | 0,08 | 7     | 1     | 0,27 | 1     | 0,19 | 2     | 0,17 | 3    | 0,015 |  |  |
| Otras enfermedades vasculares <sup>c</sup> | 19    | 1     | 0,33 | 2     | 0,38 | 7     | 0,63 | 10   | 0,38 | 6     | 0     | 0,27 | 0     | 0,19 | 3     | 0,48 | 3    | 0,12  |  |  |
| Diabetes mellitus                          | 7     | 1     | 0,33 | 1     | 0,38 | 4     | 0,25 | 1    | 0,02 | 1     | 0     | 0,27 | 0     | 0,19 | 1     | 0,10 | 0    | 0,006 |  |  |
| Influenza-neumonía-tuberculosis            | 16    | 1     | 0,60 | 1     | 0,84 | 2     | 0,36 | 13   | 0,18 | 6     | 1     | 0,62 | 2     | 0,75 | 0     | 0,12 | 2    | 0,03  |  |  |
| Enfermedad pulmonar obstructiva crónica    | 118   | 1     | 0,60 | 8     | 0,84 | 22    | 0,90 | 88   | 0,81 | 18    | 1     | 0,59 | 1     | 0,63 | 8     | 0,87 | 9    | 0,41  |  |  |
| Total                                      | 593   |       |      |       |      |       |      |      |      |       |       | 123  |       |      |       |      |      |       |  |  |

**3.16. Número de muertes atribuidas al consumo de tabaco y fracciones atribuidas poblacionales en País Vasco, 2017**

|                                            | Varones               |       |      |       |      |       |      |      |      |       | Mujeres               |      |       |      |       |      |      |       |  |  |  |  |
|--------------------------------------------|-----------------------|-------|------|-------|------|-------|------|------|------|-------|-----------------------|------|-------|------|-------|------|------|-------|--|--|--|--|
|                                            | Grupos de edad (años) |       |      |       |      |       |      |      |      |       | Grupos de edad (años) |      |       |      |       |      |      |       |  |  |  |  |
|                                            | Total                 | 35-54 |      | 55-64 |      | 65-74 |      | ≥ 75 |      | Total | 35-54                 |      | 55-64 |      | 65-74 |      | ≥ 75 |       |  |  |  |  |
|                                            | MA                    | FAP   | MA   | FAP   | MA   | FAP   | MA   | FAP  | MA   | FAP   | MA                    | FAP  | MA    | FAP  | MA    | FAP  | MA   | FAP   |  |  |  |  |
| Cáncer de tráquea-bronquios-pulmón         | 778                   | 51    | 0,86 | 165   | 0,86 | 287   | 0,88 | 274  | 0,84 | 215   | 35                    | 0,79 | 83    | 0,83 | 55    | 0,75 | 42   | 0,46  |  |  |  |  |
| Otros cánceres <sup>a</sup>                | 433                   | 27    | 0,27 | 58    | 0,27 | 128   | 0,31 | 220  | 0,27 | 66    | 6                     | 0,13 | 23    | 0,24 | 17    | 0,12 | 20   | 0,04  |  |  |  |  |
| Cardiopatía isquémica                      | 243                   | 48    | 0,57 | 46    | 0,43 | 48    | 0,35 | 100  | 0,21 | 47    | 8                     | 0,59 | 9     | 0,35 | 9     | 0,23 | 22   | 0,05  |  |  |  |  |
| Otras enfermedades cardíacas <sup>b</sup>  | 151                   | 12    | 0,36 | 19    | 0,39 | 28    | 0,25 | 93   | 0,13 | 52    | 3                     | 0,28 | 4     | 0,19 | 5     | 0,11 | 39   | 0,03  |  |  |  |  |
| Enfermedad cerebrovascular                 | 84                    | 7     | 0,36 | 12    | 0,39 | 19    | 0,21 | 45   | 0,10 | 31    | 5                     | 0,28 | 5     | 0,19 | 5     | 0,13 | 17   | 0,024 |  |  |  |  |
| Otras enfermedades vasculares <sup>c</sup> | 84                    | 3     | 0,36 | 4     | 0,39 | 20    | 0,59 | 57   | 0,44 | 16    | 1                     | 0,28 | 1     | 0,19 | 2     | 0,42 | 12   | 0,15  |  |  |  |  |
| Diabetes mellitus                          | 16                    | 1     | 0,36 | 4     | 0,39 | 7     | 0,26 | 4    | 0,03 | 2     | 0                     | 0,28 | 0     | 0,19 | 1     | 0,09 | 1    | 0,005 |  |  |  |  |
| Influenza-neumonía-tuberculosis            | 61                    | 2     | 0,62 | 6     | 0,84 | 7     | 0,35 | 46   | 0,22 | 14    | 2                     | 0,64 | 1     | 0,74 | 1     | 0,10 | 9    | 0,04  |  |  |  |  |
| Enfermedad pulmonar obstructiva crónica    | 359                   | 4     | 0,62 | 9     | 0,84 | 53    | 0,88 | 293  | 0,84 | 87    | 0                     | 0,61 | 8     | 0,64 | 15    | 0,85 | 63   | 0,45  |  |  |  |  |
| Total                                      | 2.208                 |       |      |       |      |       |      |      |      |       |                       | 529  |       |      |       |      |      |       |  |  |  |  |

**3.17. Número de muertes atribuidas al consumo de tabaco y fracciones atribuidas poblacionales en La Rioja, 2017**

|                                            | Varones               |       |      |       |      |       |      |      |      |       | Mujeres               |      |       |      |       |      |      |       |  |  |
|--------------------------------------------|-----------------------|-------|------|-------|------|-------|------|------|------|-------|-----------------------|------|-------|------|-------|------|------|-------|--|--|
|                                            | Grupos de edad (años) |       |      |       |      |       |      |      |      |       | Grupos de edad (años) |      |       |      |       |      |      |       |  |  |
|                                            | Total                 | 35-54 |      | 55-64 |      | 65-74 |      | ≥ 75 |      | Total | 35-54                 |      | 55-64 |      | 65-74 |      | ≥ 75 |       |  |  |
|                                            |                       | MA    | FAP  | MA    | FAP  | MA    | FAP  | MA   | FAP  | MA    | FAP                   | MA   | FAP   | MA   | FAP   | MA   | FAP  |       |  |  |
| Cáncer de tráquea-bronquios-pulmón         | 81                    | 9     | 0,85 | 17    | 0,87 | 25    | 0,88 | 30   | 0,80 | 16    | 3                     | 0,81 | 5     | 0,85 | 4     | 0,73 | 3    | 0,29  |  |  |
| Otros cánceres <sup>a</sup>                | 55                    | 4     | 0,26 | 8     | 0,28 | 16    | 0,30 | 27   | 0,23 | 10    | 1                     | 0,12 | 5     | 0,25 | 3     | 0,11 | 1    | 0,02  |  |  |
| Cardiopatía isquémica                      | 31                    | 4     | 0,55 | 5     | 0,45 | 5     | 0,35 | 17   | 0,18 | 4     | 0                     | 0,60 | 1     | 0,38 | 1     | 0,21 | 3    | 0,03  |  |  |
| Otras enfermedades cardíacas <sup>b</sup>  | 20                    | 1     | 0,34 | 3     | 0,40 | 3     | 0,25 | 13   | 0,10 | 6     | 0                     | 0,31 | 0     | 0,21 | 1     | 0,10 | 4    | 0,02  |  |  |
| Enfermedad cerebrovascular                 | 13                    | 1     | 0,34 | 4     | 0,40 | 2     | 0,22 | 6    | 0,08 | 3     | 0                     | 0,31 | 1     | 0,21 | 1     | 0,13 | 1    | 0,009 |  |  |
| Otras enfermedades vasculares <sup>c</sup> | 12                    | 0     | 0,34 | 1     | 0,40 | 4     | 0,60 | 8    | 0,38 | 1     | 0                     | 0,31 | 0     | 0,21 | 0     | 0,40 | 1    | 0,08  |  |  |
| Diabetes mellitus                          | 3                     | 0     | 0,34 | 1     | 0,40 | 1     | 0,24 | 1    | 0,03 | 1     | 0                     | 0,31 | 0     | 0,21 | 0     | 0,07 | 0    | 0,004 |  |  |
| Influenza-neumonía-tuberculosis            | 8                     | 1     | 0,61 | 2     | 0,85 | 1     | 0,34 | 4    | 0,20 | 0     | 0                     | 0,65 | 0     | 0,75 | 0     | 0,09 | 0    | 0,02  |  |  |

|                                         |     |   |      |   |      |   |      |    |     |    |   |      |   |      |   |      |   |      |
|-----------------------------------------|-----|---|------|---|------|---|------|----|-----|----|---|------|---|------|---|------|---|------|
| Enfermedad pulmonar obstructiva crónica | 54  | 0 | 0,61 | 3 | 0,85 | 8 | 0,88 | 43 | 0,8 | 7  | 1 | 0,63 | 0 | 0,68 | 2 | 0,83 | 4 | 0,31 |
| Total                                   | 277 |   |      |   |      |   |      |    |     | 48 |   |      |   |      |   |      |   |      |

---

FAP: fracción atribuida poblacional, MA: mortalidad atribuida.

<sup>a</sup>Tumores de labio, cavidad oral, faringe, esófago, estómago, colon y recto, células hepáticas, páncreas, laringe, cuello de útero, vejiga urinaria, riñón-pelvis renal y leucemia mieloide aguda.

<sup>b</sup>Enfermedad reumática del corazón, enfermedades cardiopulmonares y otras formas de enfermedad cardiaca.

<sup>c</sup>Aterosclerosis, aneurismas y otras.

**Figura 1 del material adicional.** Correlación de tasas de mortalidad atribuida al consumo de tabaco ajustadas por edad de varones y mujeres de edad  $\geq 35$  años de cada comunidad autónoma, 2017.

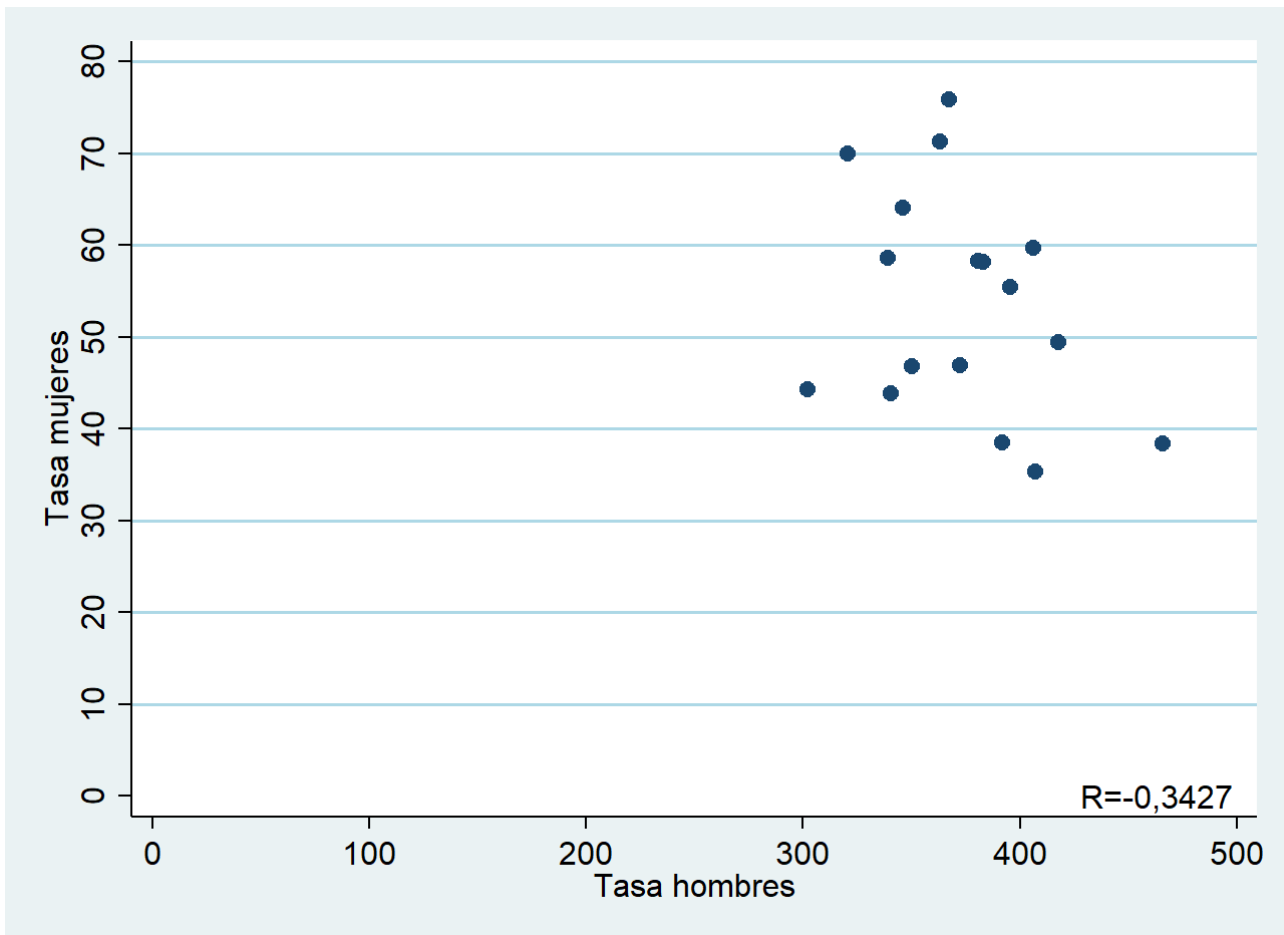

## **BIBLIOGRAFÍA**

1. National Center for Chronic Disease Prevention and Health Promotion (US) Office on Smoking and Health. *The Health Consequences of Smoking—50 Years of Progress: A Report of the Surgeon General*. Atlanta: Centers for Disease Control and Prevention (US); 2014.
2. Instituto Nacional de Estadística. Encuesta Nacional de Salud de España 2003. Ministerio de Sanidad, Servicios Sociales e Igualdad. 2003. Disponible en: <https://www.mscbs.gob.es/estadEstudios/estadisticas/encuestaNacional/encuesta2011.htm>. Consultado 21 Nov 2019.
3. Ministerio de Sanidad Consumo y Bienestar Social. Encuesta Nacional de Salud de España 2017. 2018. Disponible en: <https://www.mscbs.gob.es/estadEstudios/estadisticas/encuestaNacional/encuesta2017.htm>. Consultado 21 Nov 2019.
4. Ministerio de Sanidad Consumo y Bienestar Social. Encuesta Europea de Salud en España 2014. 2017. Disponible en: [https://www.mscbs.gob.es/estadEstudios/estadisticas/EncuestaEuropea/Enc\\_Eur\\_Salud\\_en\\_Esp\\_2014.htm](https://www.mscbs.gob.es/estadEstudios/estadisticas/EncuestaEuropea/Enc_Eur_Salud_en_Esp_2014.htm). Consultado 21 Nov 2019.
